# Supplementary material
Source: PubMed Central journal article supplement (PMC8854346)
Supplement: NIHMS1769837-supplement-1.pdf [file NIHMS1769837-supplement-1.pdf]

**The Society of Thoracic Surgeons Intermacs Annual Report**

**Twelfth Interagency Registry for Mechanically Assisted Circulatory**

**Support Report: Readmissions after LVAD Implantation**

**Supplemental Material**

## Supplemental Table: Adverse Event by Era

Adverse events by era (January 1, 2011-December 31,2020 with follow up through June 30, 2021)

| Event                            | Period <sup>a</sup> | Era 2011-2015 |                      |               |                 | Era 2016-2020 |                      |               |                 | p-value |
|----------------------------------|---------------------|---------------|----------------------|---------------|-----------------|---------------|----------------------|---------------|-----------------|---------|
|                                  |                     | Event Count   | AE Rate <sup>b</sup> | Patient Count | Patient Percent | Event Count   | AE Rate <sup>b</sup> | Patient Count | Patient Percent |         |
| Readmission (all cause)          | Early               | 8,622         | 2.97                 | 5,309         | 42.6%           | 7438          | 2.251                | 5042          | 35%             | <.0001  |
|                                  | Late                | 52,468        | 2.17                 | 9,900         | 79.4%           | 34893         | 1.779                | 9327          | 66%             | <.0001  |
| Arterial Non-CNS Thromboembolism | Early               | 124           | 0.043                | 113           | 1%              | 83            | 0.025                | 80            | 1%              | 0.0002  |
|                                  | Late                | 84            | 0.003                | 79            | 1%              | 58            | 0.003                | 50            | 0.4%            | 0.3421  |
| Major Bleeding                   | Early               | 5649          | 1.95                 | 3628          | 29%             | 4304          | 1.303                | 2939          | 21%             | <.0001  |
|                                  | Late                | 10710         | 0.44                 | 4133          | 33%             | 6199          | 0.316                | 3099          | 22%             | <.0001  |
| GI Bleeding                      | Early               | 2620          | 0.90                 | 1792          | 14%             | 2114          | 0.640                | 1557          | 11%             | <.0001  |
|                                  | Late                | 7667          | 0.32                 | 3104          | 25%             | 4423          | 0.225                | 2249          | 16%             | <.0001  |
| Non-GI Reoperation for Bleeding  | Early               | 847           | 0.29                 | 775           | 6%              | 698           | 0.211                | 626           | 4%              | <.0001  |
|                                  | Late                | 285           | 0.012                | 257           | 2%              | 169           | 0.009                | 152           | 1%              | 0.0012  |
| Cardiac Arrhythmia               | Early               | 3699          | 1.27                 | 2692          | 22%             | 3058          | 0.925                | 2375          | 17%             | <.0001  |
|                                  | Late                | 3689          | 0.15                 | 2142          | 17%             | 2288          | 0.117                | 1523          | 11%             | <.0001  |
| Device Malfunction/Pump Thrombus | Early               | 1305          | 0.45                 | 1086          | 9%              | 677           | 0.205                | 594           | 4%              | <.0001  |
|                                  | Late                | 6270          | 0.26                 | 3706          | 30%             | 2361          | 0.120                | 1728          | 12%             | <.0001  |
| Device Malfunction               | Early               | 913           | 0.31                 | 788           | 6%              | 250           | 0.076                | 234           | 2%              | <.0001  |
|                                  | Late                | 4082          | 0.17                 | 2712          | 22%             | 1111          | 0.057                | 889           | 6%              | <.0001  |
| Pump Thrombus                    | Early               | 551           | 0.19                 | 477           | 4%              | 442           | 0.134                | 385           | 3%              | <.0001  |
|                                  | Late                | 2354          | 0.097                | 1693          | 14%             | 1311          | 0.067                | 1001          | 7%              | <.0001  |
| Major Infection                  | Early               | 5286          | 1.82                 | 3635          | 29%             | 4323          | 1.308                | 3169          | 22%             | <.0001  |
|                                  | Late                | 12972         | 0.54                 | 5440          | 44%             | 8905          | 0.454                | 4699          | 33%             | <.0001  |
| MCS Infection                    | Early               | 679           | 0.23                 | 623           | 5%              | 499           | 0.151                | 469           | 3%              | <.0001  |
|                                  | Late                | 4873          | 0.20                 | 2703          | 22%             | 3377          | 0.172                | 2157          | 15%             | <.0001  |
| Non-MCS Infection                | Early               | 4803          | 1.65                 | 3318          | 27%             | 3956          | 1.197                | 2898          | 20%             | <.0001  |
|                                  | Late                | 9178          | 0.38                 | 4405          | 35%             | 6192          | 0.316                | 3609          | 25%             | <.0001  |

|                          |       |      |       |      |      |      |       |      |      |        |
|--------------------------|-------|------|-------|------|------|------|-------|------|------|--------|
| Hepatic Dysfunction      | Early | 309  | 0.11  | 289  | 2%   | 276  | 0.084 | 270  | 2%   | 0.0034 |
|                          | Late  | 457  | 0.019 | 413  | 3%   | 263  | 0.013 | 243  | 2%   | <.0001 |
| Myocardial Infarction    | Early | 42   | 0.014 | 39   | 0.3% | 26   | 0.008 | 26   | 0.2% | 0.0133 |
|                          | Late  | 77   | 0.003 | 68   | 1%   | 41   | 0.002 | 38   | 0.3% | 0.0279 |
| Neurological Dysfunction | Early | 1603 | 0.55  | 1401 | 11%  | 1548 | 0.468 | 1377 | 10%  | <.0001 |
|                          | Late  | 3961 | 0.16  | 2758 | 22%  | 2583 | 0.132 | 1936 | 14%  | <.0001 |
| Stroke                   | Early | 896  | 0.31  | 822  | 7%   | 946  | 0.286 | 864  | 6%   | 0.1086 |
|                          | Late  | 2503 | 0.10  | 1985 | 16%  | 1705 | 0.087 | 1393 | 10%  | <.0001 |
| Pericardial Drainage     | Early | 571  | 0.20  | 511  | 4%   | 435  | 0.132 | 397  | 3%   | <.0001 |
|                          | Late  | 25   | 0.001 | 24   | 0.2% | 18   | 0.001 | 17   | 0.1% | 0.6973 |
| Renal Dysfunction        | Early | 1376 | 0.47  | 1267 | 10%  | 1412 | 0.427 | 1301 | 9%   | 0.0064 |
|                          | Late  | 1331 | 0.055 | 1079 | 9%   | 862  | 0.044 | 702  | 5%   | <.0001 |
| Respiratory Failure      | Early | 2486 | 0.86  | 1997 | 16%  | 2316 | 0.701 | 1865 | 13%  | <.0001 |
|                          | Late  | 1527 | 0.063 | 1245 | 10%  | 883  | 0.045 | 736  | 5%   | <.0001 |
| Venous Thromboembolism   | Early | 477  | 0.16  | 444  | 4%   | 218  | 0.066 | 205  | 1%   | <.0001 |
|                          | Late  | 120  | 0.005 | 114  | 1%   | 68   | 0.003 | 64   | 0%   | 0.0172 |
| Wound Dehiscence         | Early | 190  | 0.065 | 174  | 1%   | 123  | 0.037 | 116  | 1%   | <.0001 |
|                          | Late  | 101  | 0.004 | 89   | 1%   | 54   | 0.003 | 50   | 0.4% | 0.0125 |
| Other SAE                | Early | 4310 | 1.48  | 2679 | 21%  | 3495 | 1.058 | 2248 | 16%  | <.0001 |
|                          | Late  | 5445 | 0.23  | 2771 | 22%  | 3169 | 0.162 | 1931 | 14%  | <.0001 |

<sup>a</sup>Early = within 90 days post implant; Late = beyond 90 days post implant

<sup>b</sup>Rates are reported per patient year

## Supplemental Figures

### Supplemental Figure 1: Mechanical Circulatory Support Implantation from 2010 to

2020

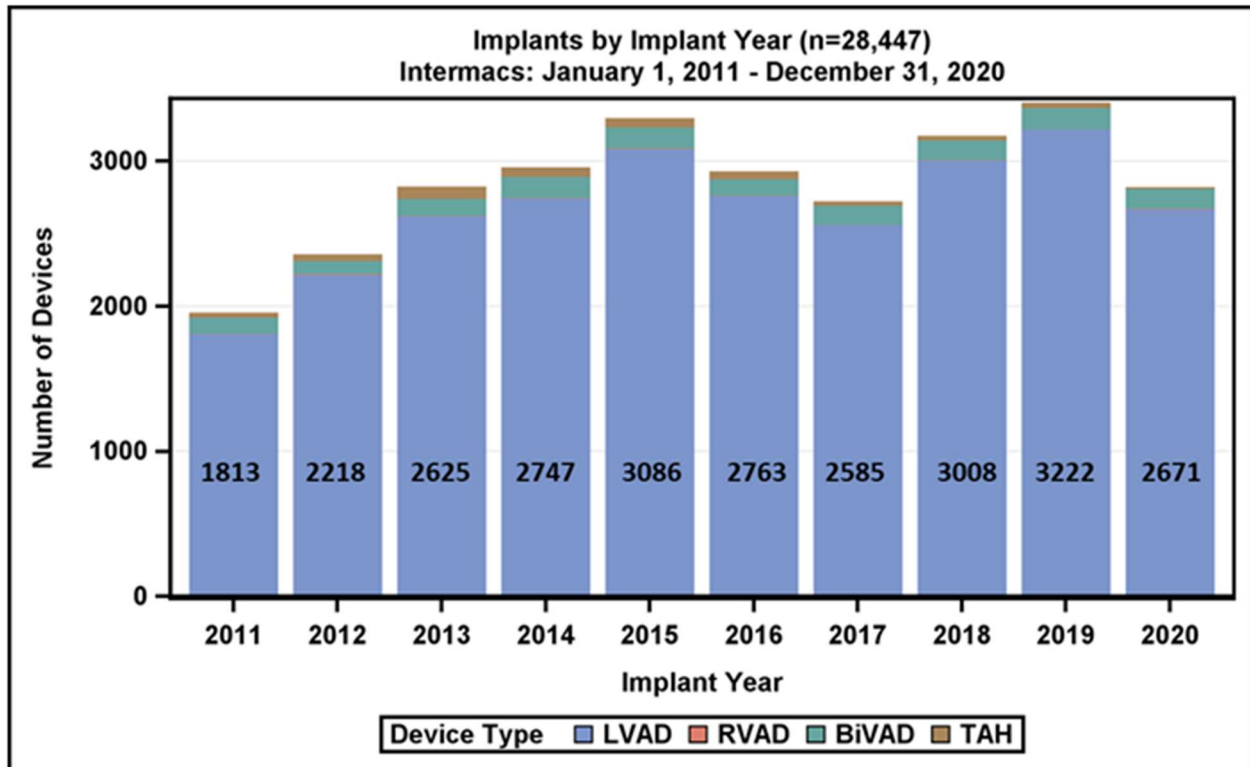

**Supplemental Figure 2: Long-term Survival in LVAD Patients from 2010 to 2020**

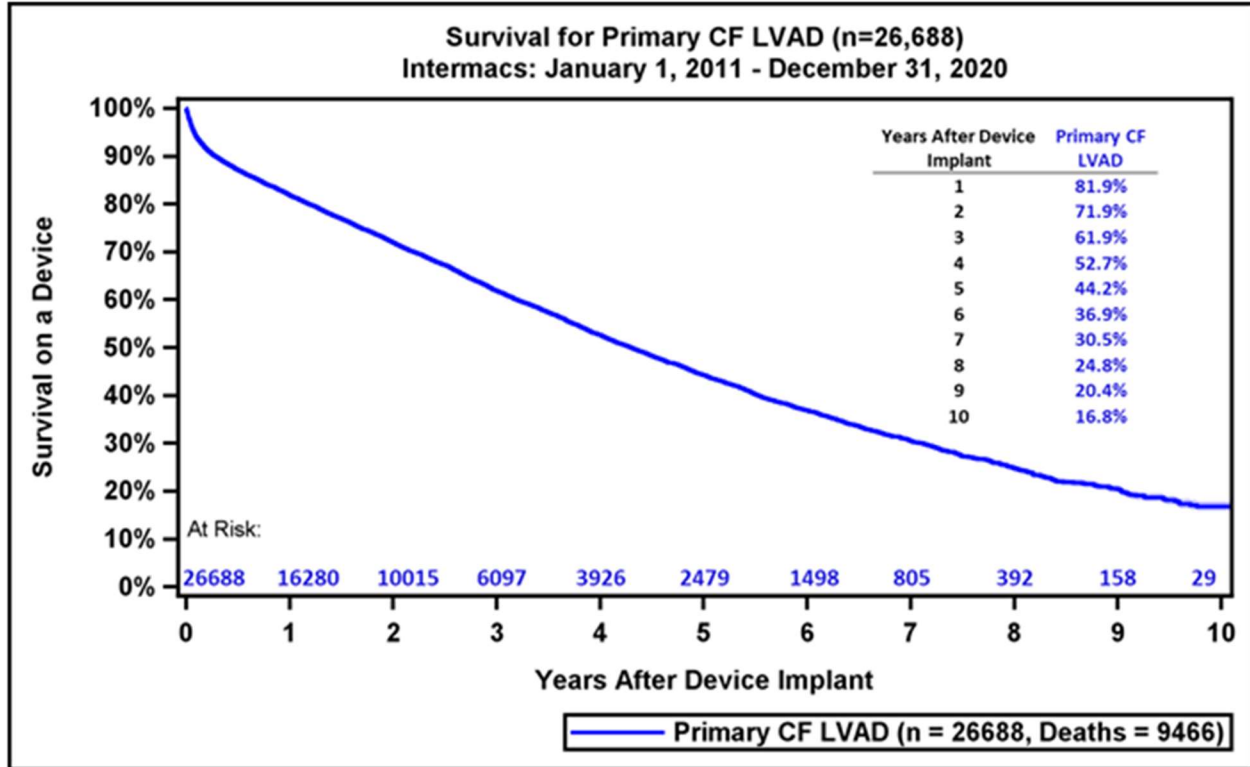

Shaded areas indicate 70% confidence limits,  $p$  (log-rank) =  $<0.0001$ , Event: Death (censored at transplant or cessation of support)

### Supplemental Figure 3: Comparison of Survival in Recent Era vs. Previous Era by Intermacs Profile

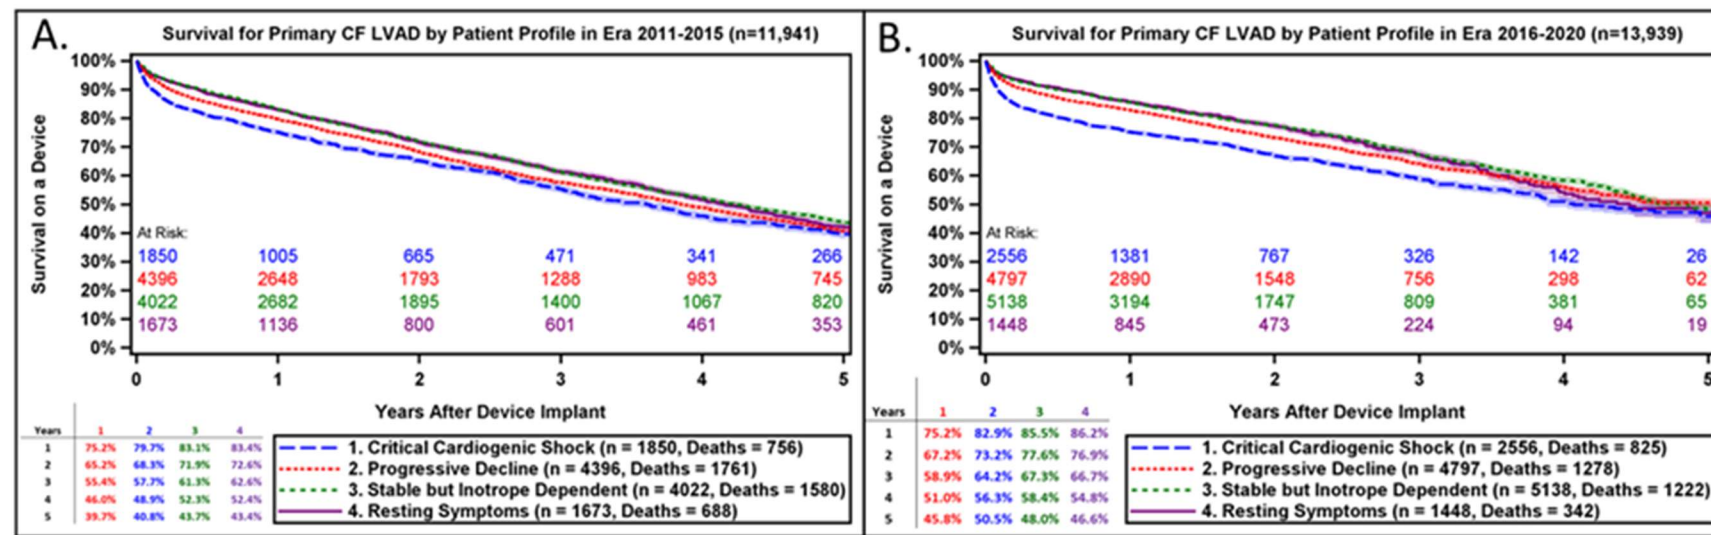

Shaded areas indicate 70% confidence limits, p (log-rank) = <0.0001, Event: Death (censored at transplant or cessation of support)

**Supplemental Figure 4: Competing Outcomes Analysis for All LVAD Patients**

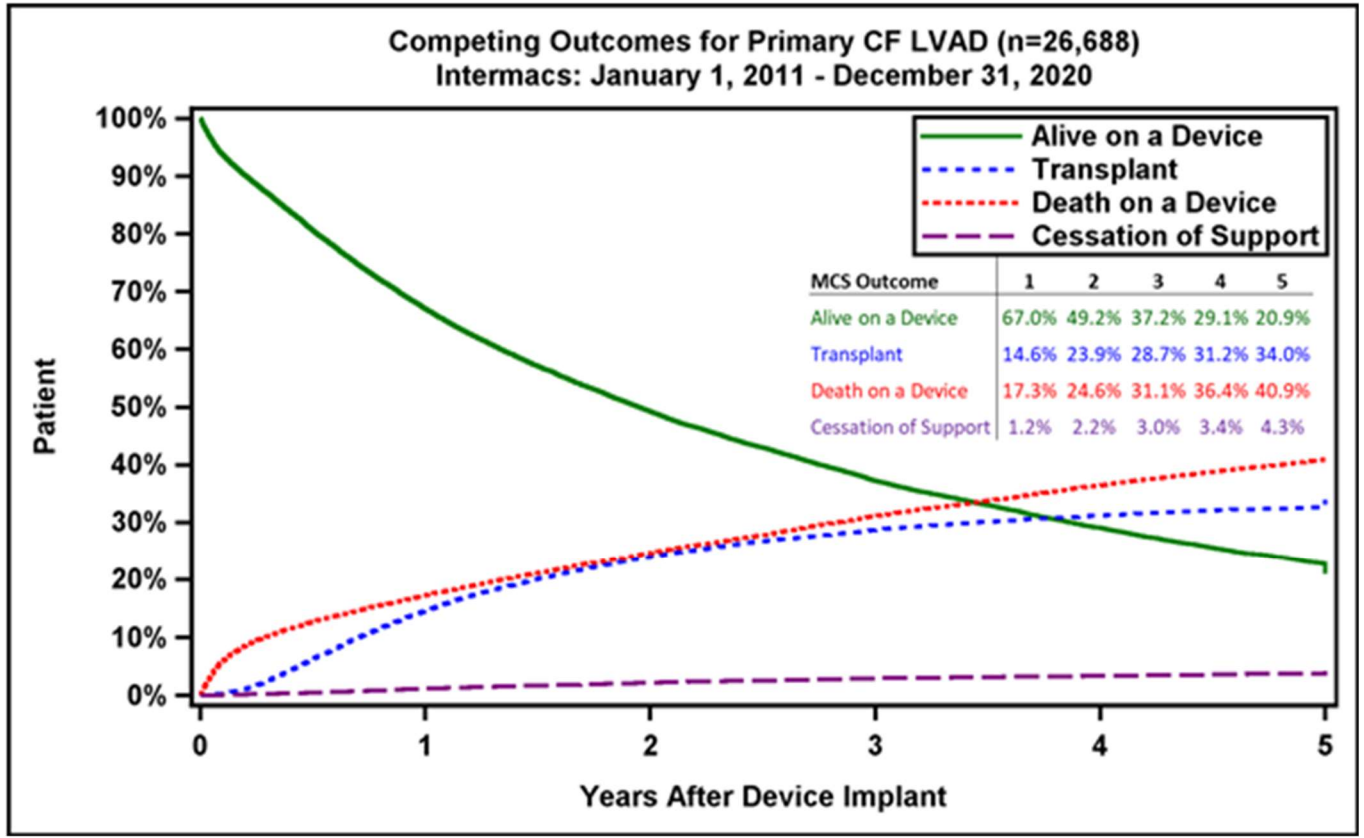

Shaded areas indicate 70% confidence limits,  $p$  (log-rank) =  $<0.0001$ , Event: Death (censored at transplant or cessation of support)

**Supplemental Figure 5: Competing Outcomes Analysis for All LVAD Patients by Intent at Time of Device Implant and Era**

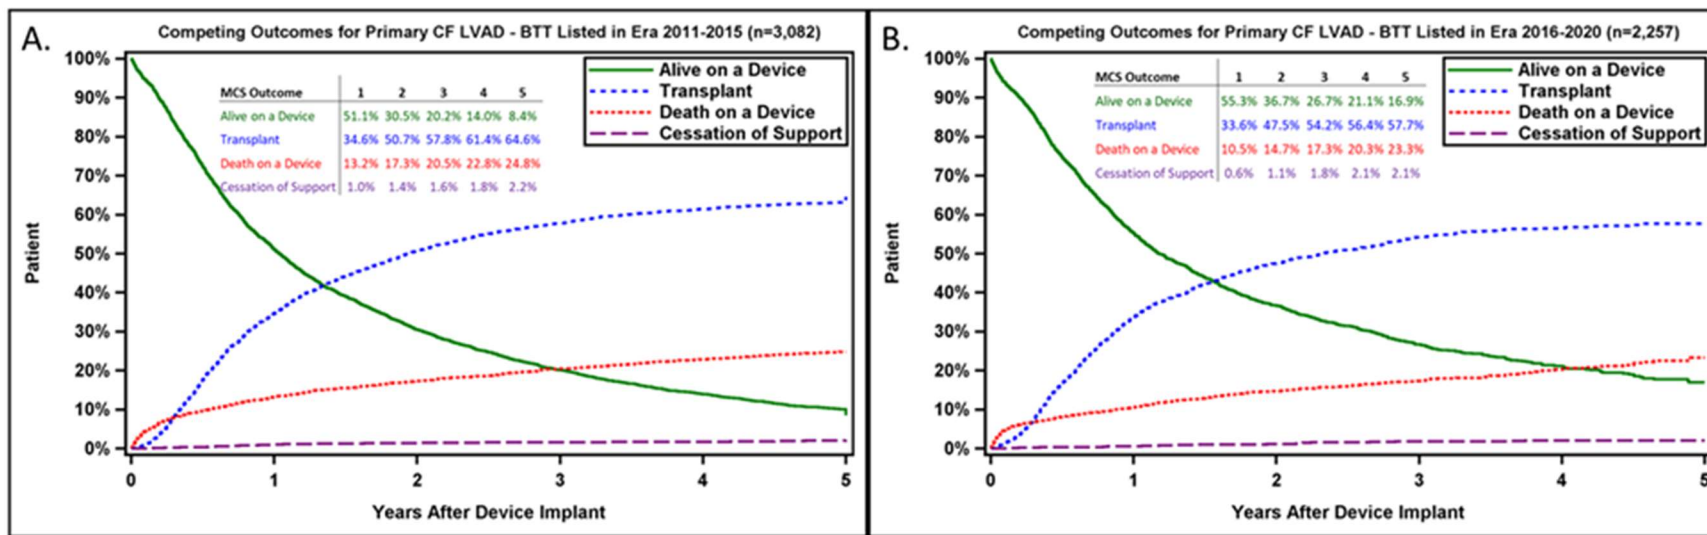



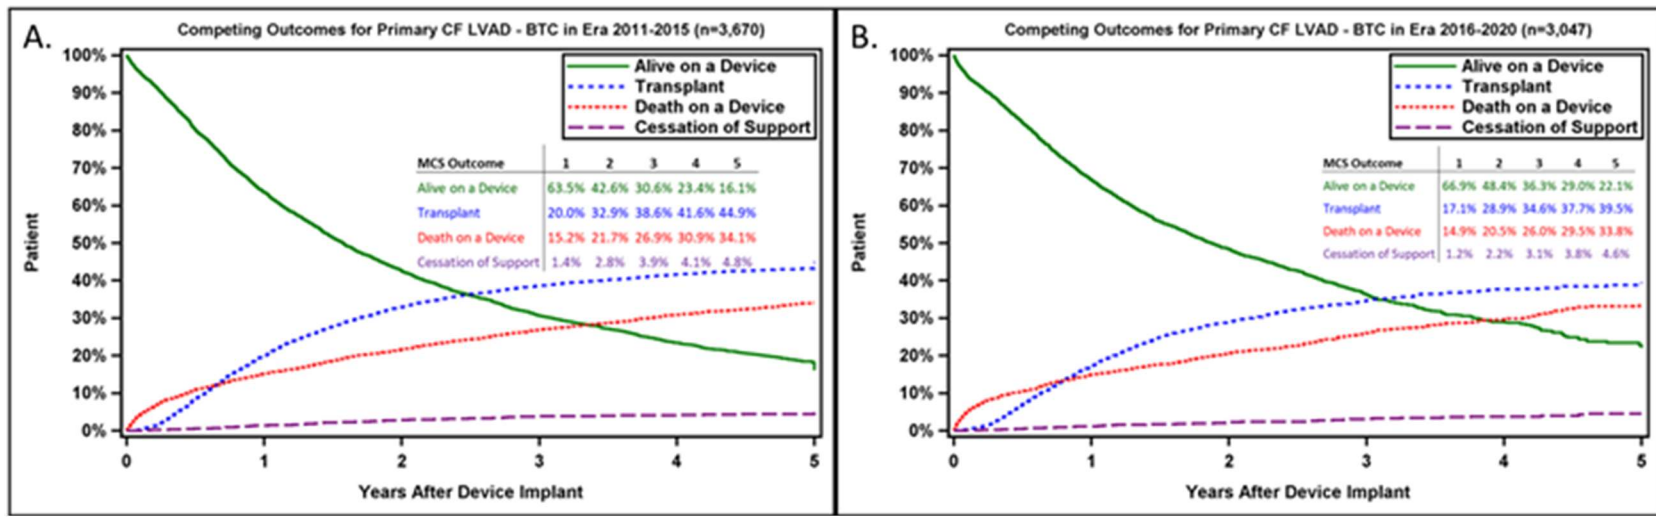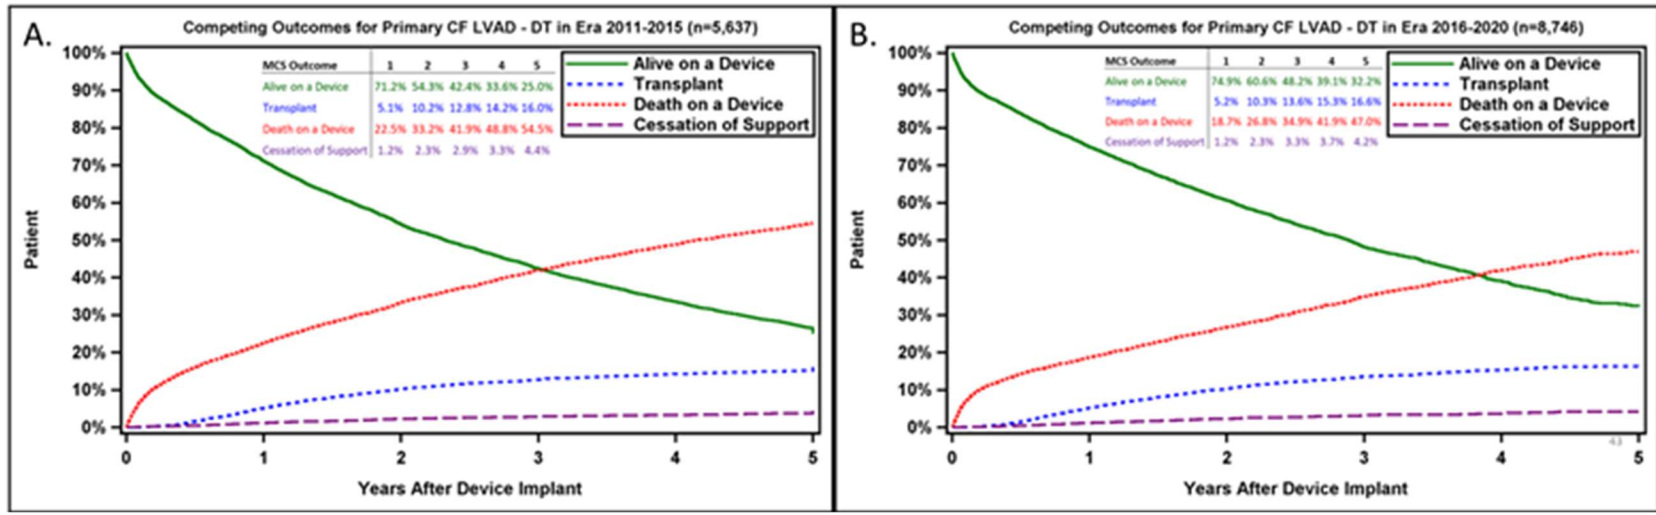

Shaded areas indicate 70% confidence limits,  $p$  (log-rank) =  $<0.0001$ , Event: Death (censored at transplant or cessation of support)

### Supplemental Figure 6: Comparison of Survival in Recent Era vs. Previous Era by Implant Strategy

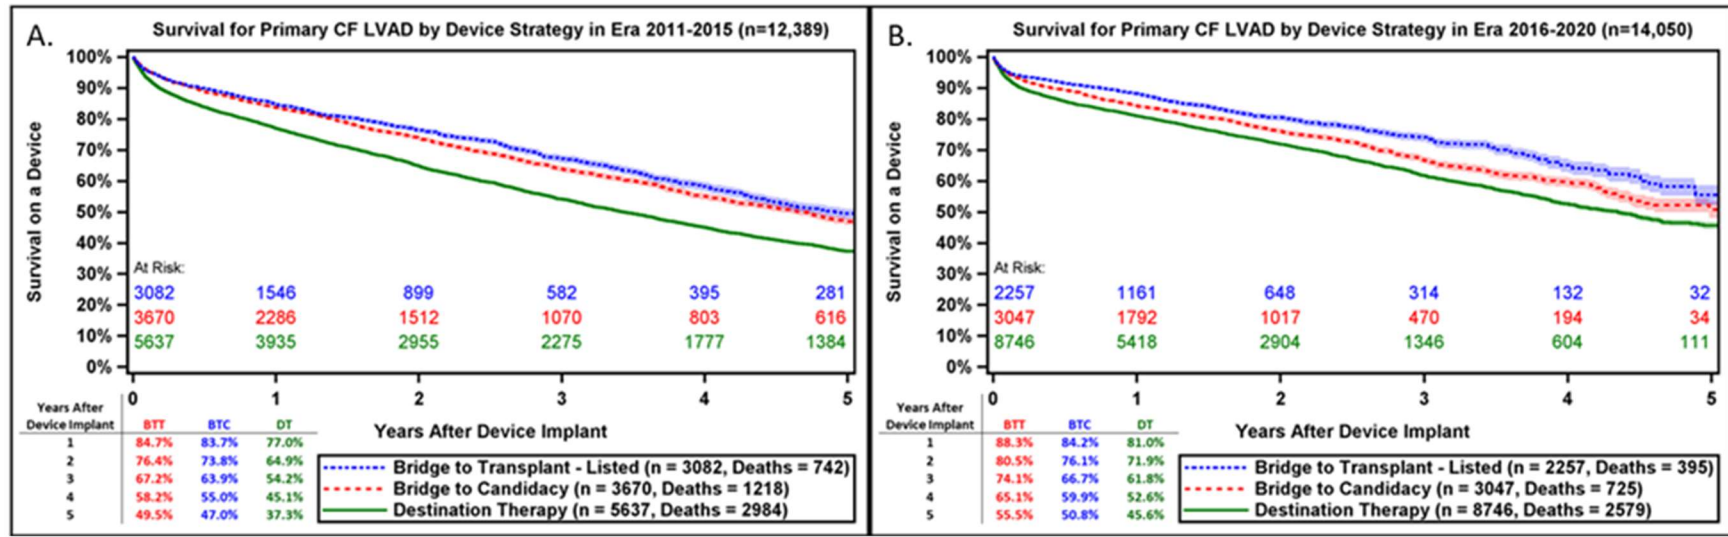

Shaded areas indicate 70% confidence limits, p (log-rank) = <0.0001, Event: Death (censored at transplant or cessation of support)

### Supplemental Figure 7: Competing Risks Analysis by Era in All LVAD Patients

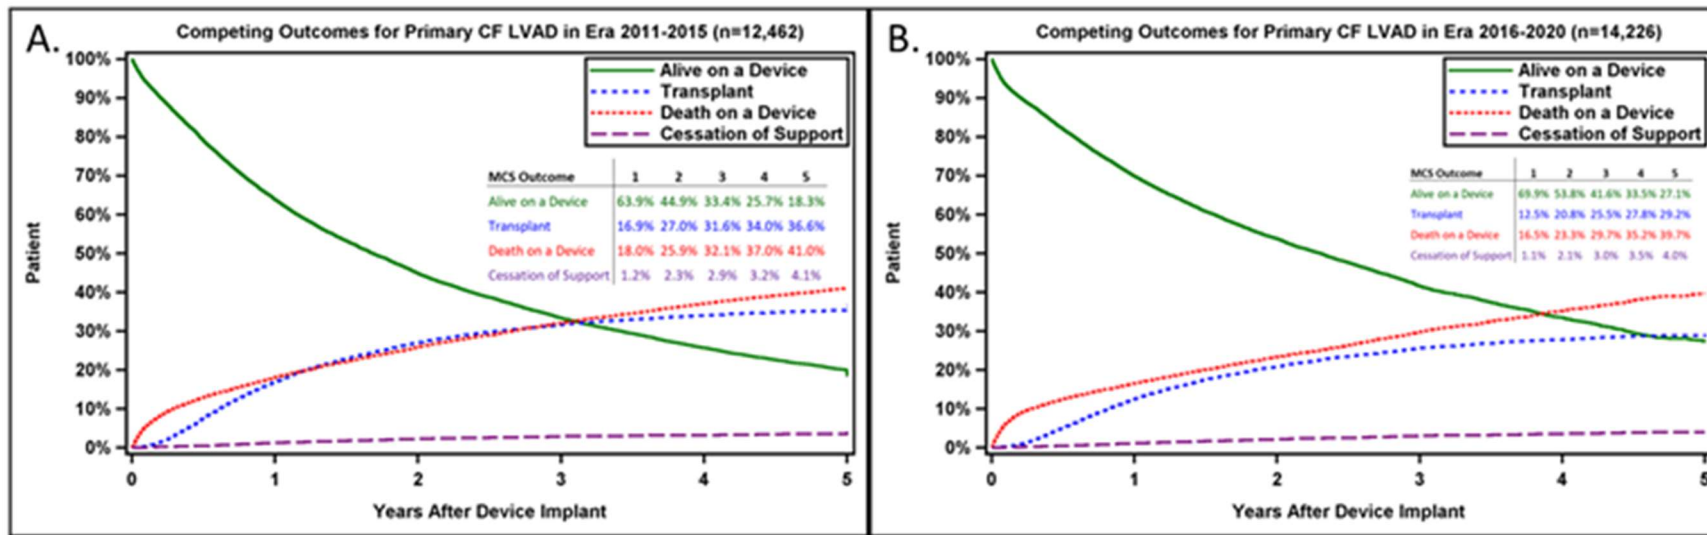

Shaded areas indicate 70% confidence limits,  $p$  (log-rank) =  $<0.0001$ , Event: Death (censored at transplant or cessation of support)

**Supplemental Figure 8: Freedom from First Bleeding, Neurological Dysfunction, Infection and non-MCS Infection by Era**

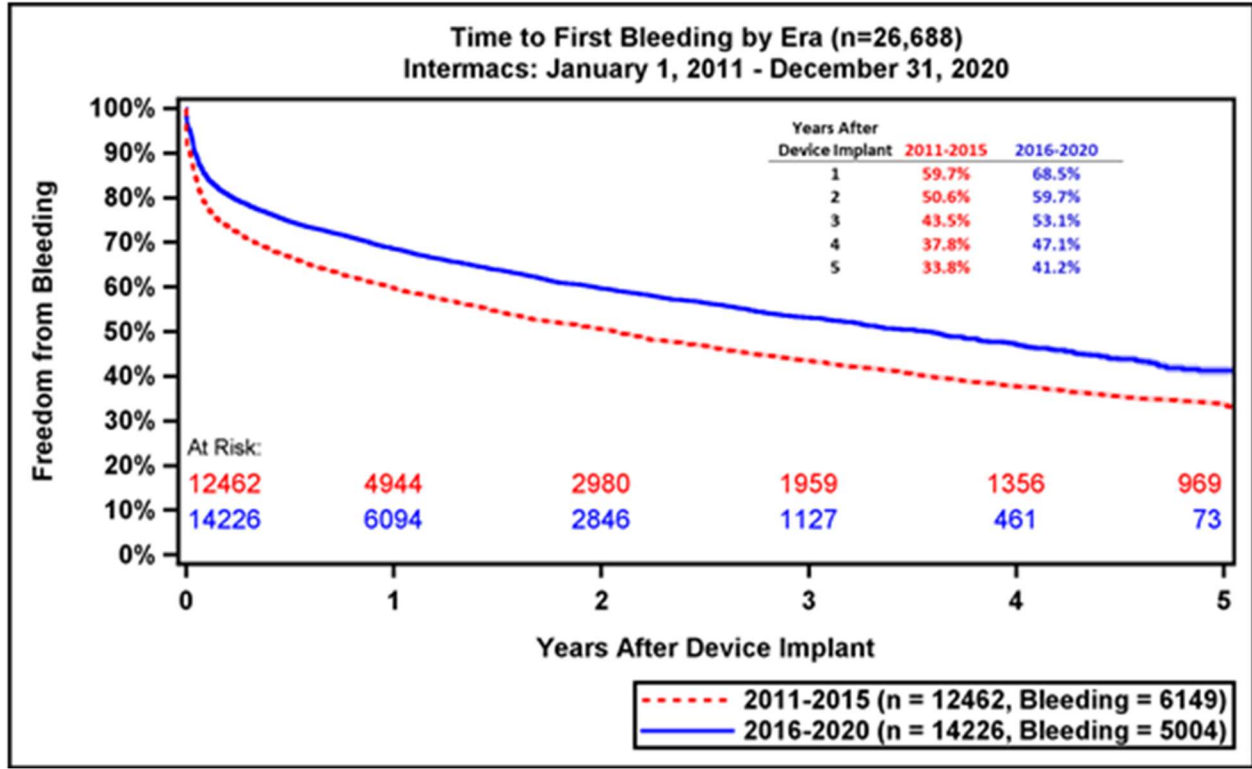

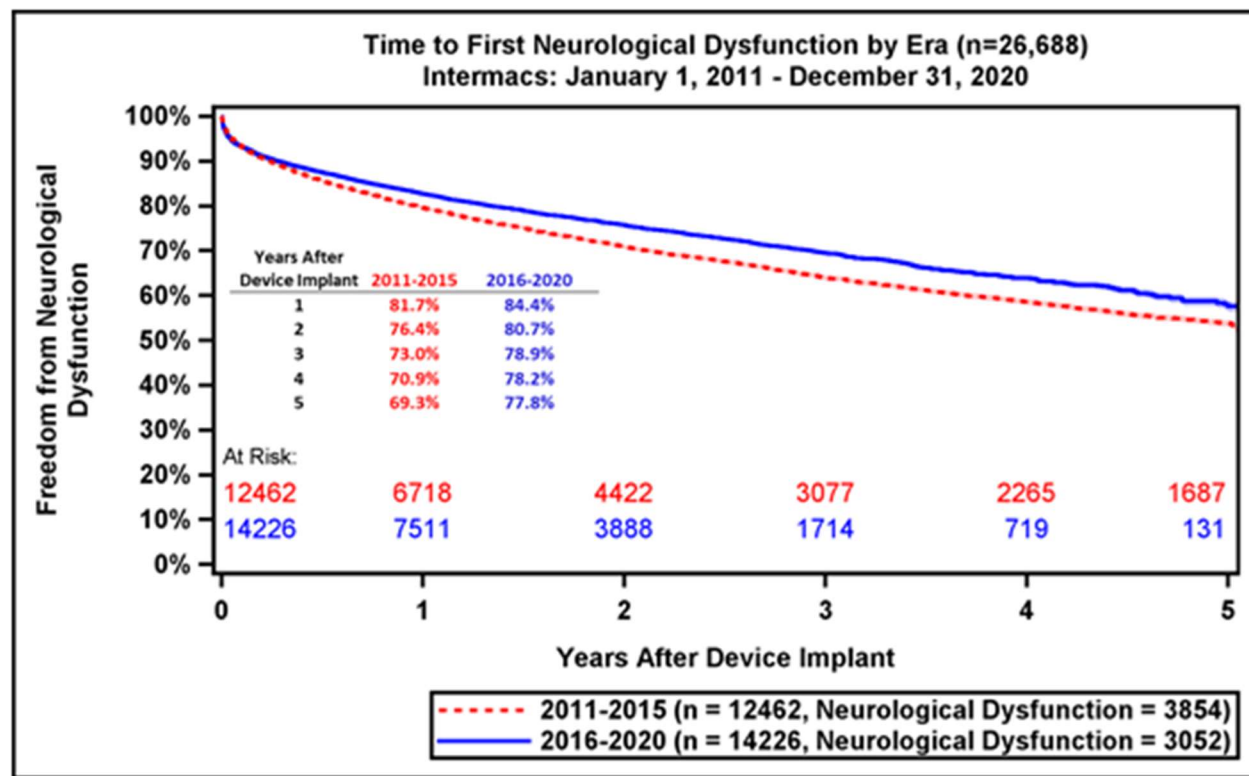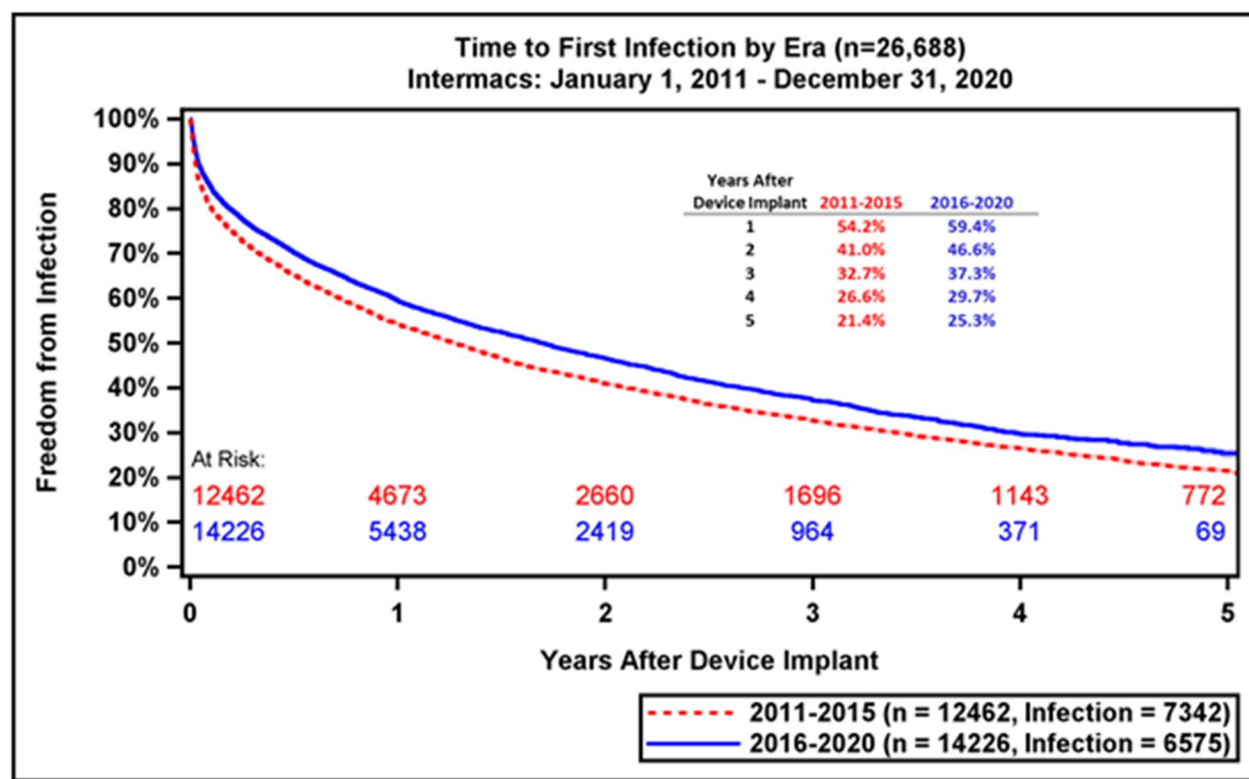

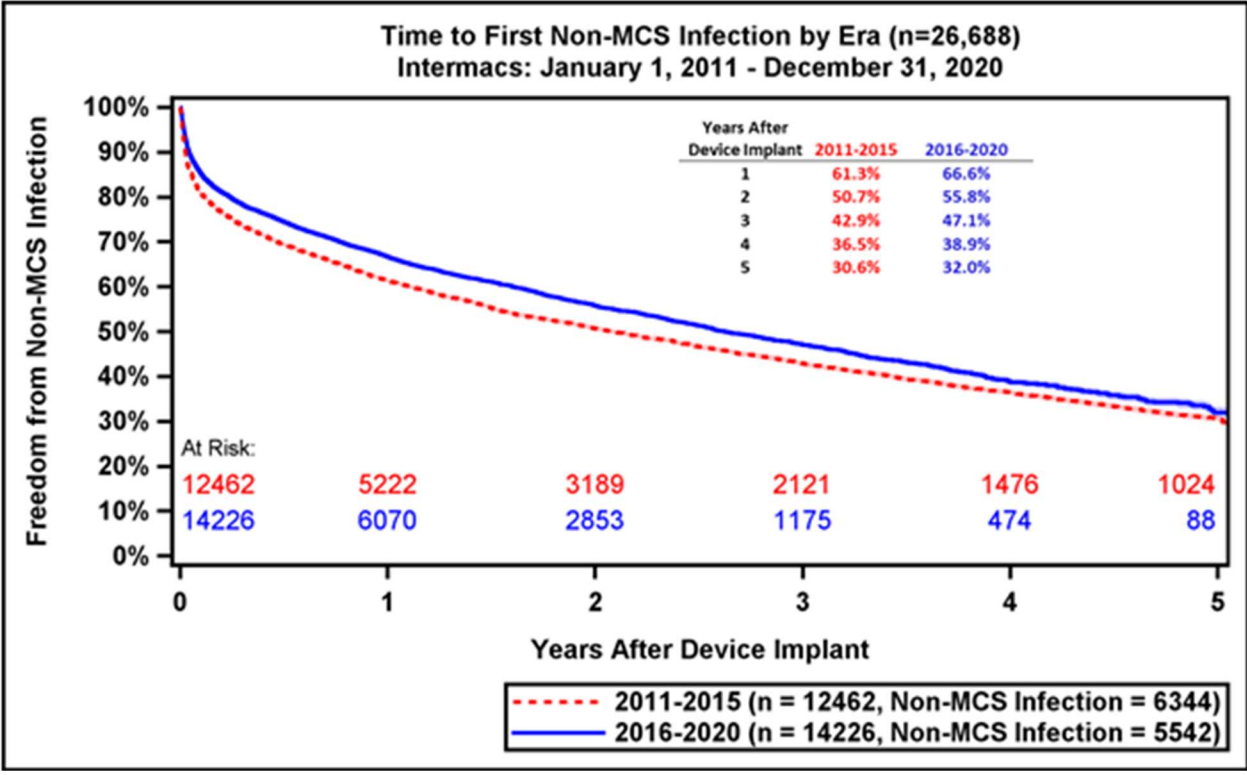

Shaded areas indicate 70% confidence limits, p (log-rank) = <0.0001, Event: Death (censored at transplant or cessation of support)

**Supplemental Figure 9: Freedom from Hospital Readmission by Era**

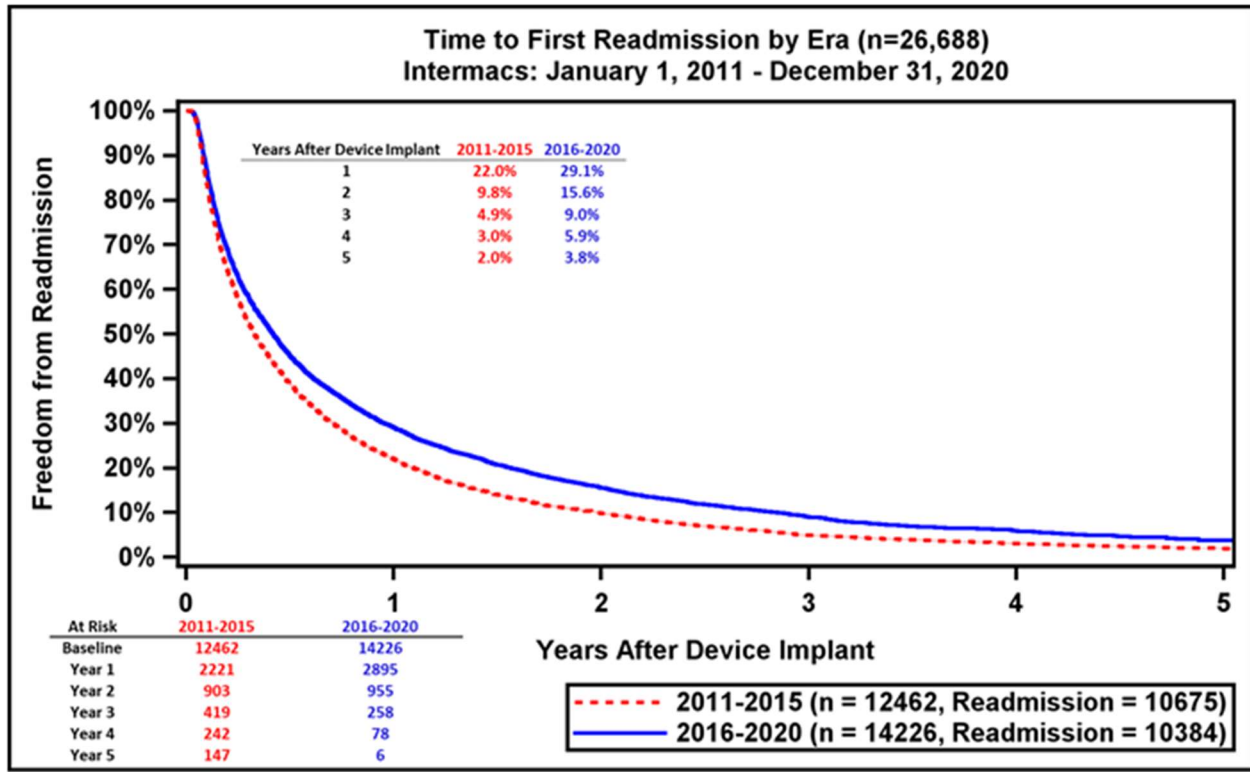

Shaded areas indicate 70% confidence limits, p (log-rank) = <0.0001, Event: Death (censored at transplant or cessation of support)
